# Supplementary material for: Remobilization of southern African desert dune systems by twenty-first century global warming
Source: Springer Nature journal article supplement (doi:10.1038/nature03717), 2005-06-01
Supplement: 41586_2005_BFnature03717_MOESM1_ESM.pdf [file 41586_2005_BFnature03717_MOESM1_ESM.pdf]

| Dune mobility state                                                                 | $PA_{GCM}$ value | Description                                                                                                                                                                                                  | Calibration examples, southern dunefield                                                                                                                                                                                                                                                                                                                                                                                                                 |
|-------------------------------------------------------------------------------------|------------------|--------------------------------------------------------------------------------------------------------------------------------------------------------------------------------------------------------------|----------------------------------------------------------------------------------------------------------------------------------------------------------------------------------------------------------------------------------------------------------------------------------------------------------------------------------------------------------------------------------------------------------------------------------------------------------|
|    | > 700            | Dynamic dune landscape: <ul style="list-style-type: none"> <li>• Bare sharp crests</li> <li>• Bare rippled dune flanks</li> <li>• Sparsely vegetated interdunes with potential for sand transport</li> </ul> | a) 1982-83 dry ENSO event reduced veg. cover (ref 29): monthly $PA_{GCM}$ values range 730 (May 82) - 14155 (Jan 82). Sand transport inc. sparsely veg. interdunes recorded in field, activity status for year calibrates with fully active status for 1982 in ref 16.<br>b) Sept 1986 $PA_{GCM}$ = 4452: 69% area <35% veg. cover, 16% area <14% cover, inc. interdunes (ref 6); fully active dune status in annual index value (ref 16).               |
|    | 160 - 700        | Significant dune activity: <ul style="list-style-type: none"> <li>• Active crests</li> <li>• Limited flank vegetation with evidence of sand transport</li> <li>• Moderate interdune vegetation</li> </ul>    | a) Sept 1986 $PA_{GCM}$ = 562: crest and flank activity recorded in field.<br>b) Aug 1992 $PA_{GCM}$ = 668: sand transport recorded on crests and flanks, interdunes veg. and inactive (ref 7).<br>c) Sept 1999 $PA_{GCM}$ = 160: 17-20% veg. cover on crest and flanks where activity and rippling recorded in field.                                                                                                                                   |
|   | 70 - 160         | Restricted dune activity: <ul style="list-style-type: none"> <li>• Limited activity, restricted to crests</li> <li>• Flanks largely vegetated</li> <li>• Interdunes well vegetated</li> </ul>                | a) Aug-Oct 1986 $PA_{GCM}$ = 123-127. 1986: 50% dunes <20% veg. cover (ref 28). 20% cover = crest activity in ref 6 ( $M$ /index) 1986 crest activity in annual $PA$ value (Ref 16).<br>b) Aug-Sept 1995 $PA_{GCM}$ = 71 and 118. Crest only transport on dune crests.<br>c) Sept 1999 $PA_{GCM}$ = 159, crest movement only monitored in field, flanks vegetated.<br>d) Lowest monthly $PA_{GCM}$ value 1996 - 2000 when crest movement monitored = 76. |
|  | 0 - 70           | Inactive dunes: <ul style="list-style-type: none"> <li>• Comprehensive vegetation cover on all surfaces</li> <li>• Subdued dune forms</li> </ul>                                                             | a) July 1993 $PA_{GCM}$ = <1.95% of dune field >14% vegetation cover (ref 9).<br>b) All 1993 and 1994 monthly $PA_{GCM}$ <23; transport absent at monitored sites.<br>c) 2000 Aug-Nov values <15, crests well vegetated, no transport monitored or observed in field.                                                                                                                                                                                    |

This figure illustrates the classification of  $PA_{GCM}$  into four classes, and exemplifies the data sources used to achieve this calibration of the index. Calibration utilised  $PA_{GCM}$  values calculated for specific times when field data of actual dune mobility state were available within the period from 1982 to 2000.
